# Supplementary material
Source: PubMed Central journal article supplement (PMC1622861)
Supplement: pnas_0603781103_1.pdf [file pnas_0603781103_1.pdf]

Block1 Similarity 43%, Identity 2%

```

H.sapiens 125 DANMLGEMMFVSVAMSYKGSTLKIHQIRSPQLMLSKVFTARTG 168
X.tropicalis 125 DASMLGEMMFVSVAMSYKGSTLKIHQIRSPQLMLSKVFTARTG 168
D.terio 109 DVNMLGEMMFVSVSMYKGSTLKIHHIRSPQLMVSQVFTSTRFG 152
D.melanogaster 108 DITVVGEMVFGSLPMSFCGLALKVHWLPEPSRLLCSQVYLTPTS 151
C.elegans 108 KTFAPKPKYRKGALPAAAAAVVRNEALMDS SDSSDSQSITVKSLDG 151
    
```

Block2 Similarity 40%, Identity 11%

```

H.sapiens 326 RKKKIAIGVIFSLSKDDEENKFNFFFSHPPLFESHMNLKLSAIEQAMKMSRRSADASQRLAYN-RIVDALNDFRFTICNLYTMPRIPEPVWLTMM 423
X.tropicalis 326 RKKKIAIGVIFSLSKDDEENKFNFFFSHPPLFESHMNLKLSAIEQAMKMSRRSADPSQRLAYN-KIVDALNDFRFTICNLYTMPRIPEPVWLTMM 423
D.terio 273 RRKKIAISIIISLPEREENHNHFQEFFFSHPPLFESHMNLKLSAIERAMIVCRRIAESQRVQVYLCRVMEALGEFRMTVWNLVYMAPRISEPVWLSMIS 371
D.melanogaster 385 LRRRAKLGAVICISMSSEFEEEMELFCSEHIALLESMLSRRLRASIELAYINHKN-----FLQIMFQAWQDTQWFSDLFTAPRIKTPVWLSITI 473
C.elegans 263 NMRNIALGILVPIKQR-----FFLMQHIPLIEAEMSRFESRVVTAALHPST-----FLQNISKSWEELTEIVCQLHNAPRLRHPYWLALNE 343
    
```

Block3 Similarity 51%, Identity 22%

```

H.sapiens 451 FLPALITAVLTHHLAWVPTVMPNGQPPKIFLEKHSQSVDM-----LAKTHPYNPLWAQLGDLYGAIQSPVRLARIVVVGKRQDMVORLLYFLTYFIRCSELOETHLLENGE 558
X.tropicalis 451 FLPALITAVLTHHLAWVPTVMPNGQPPKIFLEKHSQSVDM-----LAKTHPYNPLWAQLGDLYGAIQSPVRLARIVVIGKRQDLVORLLYFLTYFIRCSELOETHLLESSE 558
D.terio 399 FLSALLTAVLTHHLAWVPTVMPNLPPIKIPACPKPTSQTVDL-----LAKSHPYNPLWAQLGDLYGALGSPVRCVIVVVGRRRELVRVLYILSYFIRCSDLOE-HVQFQGG 505
D.melanogaster 505 FISTMLTGILTHHLGWVATVSAFNSSGSKRSESSASAAAIQRAKLLQVAQKHPYNALWAQLGDLYGAIQMPPKLARIIVCGAEKLWVEKLLNVLTYFIRCSEVRRRAAKREDFN 618
C.elegans 375 FLSNLVLTALLMHHMSWVASVASPPLHNADSKDIDENSLFGMMSG---APTGVYNALMAOYLEISGACGN-MRSAKICVVGEDLEVLASVCSVLSFFIRCSEAVHVDNDKMWE 484
    
```

Block4 Similarity 35%, Identity 14%

```

H.sapiens 1025 CLMSDLSHAVGHPVLDEPIAEAVCIADMDKWTQVQVASSQRR 1067
X.tropicalis 1022 CLMSDLSHAVGHPVLDEPIAEAVCILADVQVQVASSQRR 1064
D.terio 726 CLMADLEHIVLHPALDEPVAEALCIVADTDLRQVQVVTSSQRR 768
D.melanogaster 1238 MHLREDLAARSASLISQPAENIAIVADMCKWDVRLISSQT 1280
C.elegans 675 TSSMCDPAMNP-----ENVLIADIEQLVQVVLSTEG- 706
    
```

Block5 Similarity 35%, Identity 9%

```

H.sapiens 1073 LGKEVLVSSLVSNLLHSTLQLYKHNLSNFCVMHLEDRLQELYFKSKMLSEYLRGQMR-----VHVKELGVVLGIESSDPLLAAVASTHSPYVAQILL 1166
X.tropicalis 1070 LGKEVLVSSLVSNLLHSTVQLYKHNLSANFCIMHLEDRLQELYFKSKMLSEYLRGQTR-----VHVKELSLVLGIESSDPLLAIAIASHSPYVAQILL 1163
D.terio 775 LGRDVMVSNLIHTLITSVLQLYALNIAADFCVMHLEDRLQEVYFKSRSLAEYLRGQTR-----VHVKELGLALGIESSDIPLLAAVASTHSPYVAQILL 868
D.melanogaster 1288 QSSPVGMSQLVSNMLETQVAMNAGGIPAYECLSFLESKLEIYLSQSETLAAFLLETDP-----CRLSDITNPLQLSENDVPLLSIAYIHHPKISRKCG 1381
C.elegans 708 DEVTSPSEIVAMLEQFVGIHNAV PANAEFLVGIIEDSLAIHIVGKSLILVELVRSQTKPNPSLQLTPDRVRTIIGCDHSDLRILIVNVAAVVWPPVLOSVL 808
    
```
