# Supplementary material
Source: PubMed Central journal article supplement (PMC1622861)
Supplement: pnas_0603781103_7.pdf [file pnas_0603781103_7.pdf]

**Result of identification of HA-FLCN IP p130 by PMF analysis**

The MW of the peptide fragments obtained by MALDI-TOF/MS analysis.

|                 |                 |                 |
|-----------------|-----------------|-----------------|
| AP-1 : 584.39   | AP-11 : 1285.65 | AP-21 : 3174.56 |
| AP-2 : 709.41   | AP-12 : 1522.80 |                 |
| AP-3 : 940.41   | AP-13 : 1540.75 |                 |
| AP-4 : 994.54   | AP-14 : 1638.65 |                 |
| AP-5 : 1011.50  | AP-15 : 1648.33 |                 |
| AP-6 : 1202.64  | AP-16 : 1664.74 |                 |
| AP-7 : 1203.75  | AP-17 : 1874.98 |                 |
| AP-8 : 1218.66  | AP-18 : 2034.02 |                 |
| AP-9 : 1241.12  | AP-19 : 2050.07 |                 |
| AP-10 : 1259.77 | AP-20 : 2456.20 |                 |

**Cys modification:carboxymetylation**

Identificaion to BC001956+BAB85547

Digestion by (Enzyme) : **LysC**

(MW : **130630.18** Da)

| peptide | observed | theoretical | delta | corresponding sequence             | Head | Tail | comment  |
|---------|----------|-------------|-------|------------------------------------|------|------|----------|
| AP-1    | 584.39   | 584.34      | +0.05 | [K]KPPDK[I]                        | 732  | 736  |          |
| AP-2    | 709.41   | 709.36      | +0.05 | [K]QYRDK[L]                        | 665  | 669  |          |
| AP-3    | 940.41   | 940.38      | +0.03 | [K]QNNEFCK[C]                      | 880  | 886  |          |
| AP-4    | 994.54   | 994.52      | +0.02 | [R]STGMVVEKK[P]                    | 724  | 732  | 1Met-ox  |
| AP-5    | 1011.50  | 1011.49     | +0.01 | [K]LRTCFDAK[L]                     | 670  | 677  |          |
| AP-6    | 1202.64  | 1202.58     | +0.06 | [K]HSSQSVDMLAK[T]                  | 485  | 495  | 0Met-ox  |
| AP-7    | 1203.75  | 1203.64     | +0.11 | [K]RRNEDISVSK[L]                   | 65   | 74   |          |
| AP-8    | 1218.66  | 1218.57     | +0.09 | [K]HSSQSVDMLAK[T]                  | 485  | 495  | 1Met-ox  |
| AP-11   | 1285.65  | 1285.58     | +0.07 | [K]NHLCYRFMK[E]                    | 429  | 437  | 1Met-ox  |
| AP-12   | 1522.80  | 1522.76     | +0.04 | [K]IVPASFSCEAAQTK[V]               | 737  | 750  | 1AAM-Cys |
| AP-13   | 1540.75  | 1540.74     | +0.01 | [K]EERGAIDQHQETK[Q]                | 786  | 798  |          |
| AP-14   | 1638.65  | 1638.67     | -0.02 | [K]ESEEIRTPNCNCK[Y]                | 599  | 611  |          |
| AP-16   | 1664.74  | 1664.73     | +0.01 | [K]ESEEIRTPNCNCK[Y]                | 599  | 611  | 2AAM-Cys |
| AP-17   | 1874.98  | 1874.98     | 0.00  | [K]WTVQVASSQRRVTDNK[L]             | 1057 | 1072 |          |
| AP-18   | 2034.02  | 2034.00     | +0.02 | [K]GEIEESEYVLVTMHRNK[S]            | 576  | 592  | 0Met-ox  |
| AP-19   | 2050.07  | 2049.99     | +0.08 | [K]GEIEESEYVLVTMHRNK[S]            | 576  | 592  | 1Met-ox  |
| AP-20   | 2456.20  | 2456.19     | +0.01 | [K]TCFPQQDQRDTLSILVPHGDK[E]        | 898  | 918  |          |
| AP-21   | 3174.56  | 3174.48     | +0.08 | [K]YCSHPLLGQNVENISQQUEREDIQNSSK[E] | 612  | 638  |          |

|            |            |            |            |            |            |            |            |
|------------|------------|------------|------------|------------|------------|------------|------------|
| <b>1</b>   | <b>11</b>  | <b>21</b>  | <b>31</b>  | <b>41</b>  | <b>51</b>  | <b>61</b>  | <b>71</b>  |
| MAPTLFQKLF | SKRTGLGAPG | RDARDPDCGF | SWPLPEFDPS | QIRLIVYQDC | ERRGRNVLFD | SSVKRRNEDI | SVSKLCSDAQ |
| <b>81</b>  | <b>91</b>  | <b>101</b> | <b>111</b> | <b>121</b> | <b>131</b> | <b>141</b> | <b>151</b> |
| VKVFQKCCQL | KPGGDSSSSL | DSSVTSSSDI | KDQCLKYQGS | RCSSDANMLG | EMMFGSVAMS | YKGSTLKIHQ | IRSPQLMLS  |
| <b>161</b> | <b>171</b> | <b>181</b> | <b>191</b> | <b>201</b> | <b>211</b> | <b>221</b> | <b>231</b> |
| KVFTARTGSS | ICGSLNTLQD | SLEFINQDNN | TLKADNNTVI | NLLGNIGLS  | QFCSPRAFS  | EQGPLRLIRS | ASFFAVHSNP |
| <b>241</b> | <b>251</b> | <b>261</b> | <b>271</b> | <b>281</b> | <b>291</b> | <b>301</b> | <b>311</b> |

|                    |                    |                    |                            |                   |                  |                    |                    |
|--------------------|--------------------|--------------------|----------------------------|-------------------|------------------|--------------------|--------------------|
| MDMPGRELNE         | DRDSGIARSA         | SLSSLLITPF         | PSPNSSLTRS                 | CASSYQRRWR        | RSQTTSLENG       | VFPRWSIEES         | FNLSDDESCGP        |
| <b>321</b>         | <b>331</b>         | <b>341</b>         | <b>351</b>                 | <b>361</b>        | <b>371</b>       | <b>381</b>         | <b>391</b>         |
| NPGIVRKKKI         | AIGVIFSLSK         | DEDENNKFNE         | FFFSHFPLFE                 | SHMNKLKSAI        | EQAMKMSRRS       | ADASQRSLAY         | NRIVDALNEF         |
| <b>401</b>         | <b>411</b>         | <b>421</b>         | <b>431</b>                 | <b>441</b>        | <b>451</b>       | <b>461</b>         | <b>471</b>         |
| RTTICNLYTM         | PRIGEPVWLT         | MMSGTPEK <b>NH</b> | <b>LCYRFMKEFT</b>          | FLMENASKNQ        | FLPALITAVL       | TNHLAWVPTV         | MPNGQPPIKI         |
| <b>481</b>         | <b>491</b>         | <b>501</b>         | <b>511</b>                 | <b>521</b>        | <b>531</b>       | <b>541</b>         | <b>551</b>         |
| FLE <b>KHSSQSV</b> | <b>DMLAK</b> THPYN | PLWAQLGDLY         | GAIGSPVRLA                 | RTVVVGKRQD        | MVQRLLYFLT       | YFIRCSELQE         | THLLENGEDE         |
| <b>561</b>         | <b>571</b>         | <b>581</b>         | <b>591</b>                 | <b>601</b>        | <b>611</b>       | <b>621</b>         | <b>631</b>         |
| AIVMPGTVIT         | TTLEK <b>GEIEE</b> | <b>SEYVLVTMHR</b>  | <b>NKSSLLFKES</b>          | <b>EEIRTPNCNC</b> | <b>KYCSHPLLQ</b> | <b>NVENISQQR</b>   | <b>EDIQNSSKEL</b>  |
| <b>641</b>         | <b>651</b>         | <b>661</b>         | <b>671</b>                 | <b>681</b>        | <b>691</b>       | <b>701</b>         | <b>711</b>         |
| LGISDECRM          | SPSDCQEENA         | VDVK <b>QYRDKL</b> | <b>RTC</b> FD <b>AKLET</b> | VVCTGSVPVD        | KCALSESGLE       | STEETWQSEK         | LLDSDSHTGK         |
| <b>721</b>         | <b>731</b>         | <b>741</b>         | <b>751</b>                 | <b>761</b>        | <b>771</b>       | <b>781</b>         | <b>791</b>         |
| AMR <b>STGMVVE</b> | <b>KKPPDKIVPA</b>  | <b>SFSCEAAQTK</b>  | VTFLIGDSMS                 | PDSDELRSQ         | AVVDQITRHH       | TKPL <b>KEERGA</b> | <b>IDQHQETKQT</b>  |
| <b>801</b>         | <b>811</b>         | <b>821</b>         | <b>831</b>                 | <b>841</b>        | <b>851</b>       | <b>861</b>         | <b>871</b>         |
| TKDQSGESDT         | QNMVSEEPCE         | LPCWNHSDPE         | SMSLFDEYFN                 | DDSJETRTID        | DVPFKTSTDS       | KDHCCMLEFS         | KILCTKNN <b>KQ</b> |
| <b>881</b>         | <b>891</b>         | <b>901</b>         | <b>911</b>                 | <b>921</b>        | <b>931</b>       | <b>941</b>         | <b>951</b>         |
| <b>NNEFCKCIET</b>  | VPQDSCK <b>TCF</b> | <b>PQQDQRDTLS</b>  | <b>ILVPHGDKES</b>          | SDKKIAVGTE        | WDIPRNESSD       | SALGDSESED         | TGHDMTRQVS         |
| <b>961</b>         | <b>971</b>         | <b>981</b>         | <b>991</b>                 | <b>1001</b>       | <b>1011</b>      | <b>1021</b>        | <b>1031</b>        |
| SYYGGEQEDW         | AEEDEIPFPG         | SKLIEVSAVQ         | PNIANFGRSL                 | LGGYCSSYVP        | DFVLQIGIGSD      | ERFRQCLMSD         | LSHAVQHPVL         |
| <b>1041</b>        | <b>1051</b>        | <b>1061</b>        | <b>1071</b>                | <b>1081</b>       | <b>1091</b>      | <b>1101</b>        | <b>1111</b>        |
| DEPIAEAVCI         | IADMDK <b>WTVQ</b> | <b>VASSQRRVTD</b>  | <b>NKLGKEVLVS</b>          | SLVSNLLHST        | LQLYKHNLS        | NFCVMHLEDR         | LQELYFKSKM         |
| <b>1121</b>        | <b>1131</b>        | <b>1141</b>        | <b>1151</b>                | <b>1161</b>       |                  |                    |                    |
| LSEYLRGQMR         | VHVKELGVVL         | GISSDLPLL          | AAVASTHSPY                 | VAQILL            |                  |                    |                    |
