# Supplementary material
Source: PubMed Central journal article supplement (PMC1622861)
Supplement: pnas_0603781103_8.pdf [file pnas_0603781103_8.pdf]

The MW of the peptide fragments obtained by MALDI-TOF/MS analysis.

|                |
|----------------|
| AP-1 : 1036.58 |
| AP-2 : 1315.84 |
| AP-3 : 1376.75 |
| AP-4 : 1563.77 |
| AP-5 : 1684.81 |
|                |
|                |
|                |
|                |
|                |

Cys modification: carbamidomethylation

Identificaion to [gi|4506061|ref|NP\\_002724.1](#) AMP-activated protein kinase, noncatalytic gamma-1 subunit isoform 1; AMPK gamma-1 chain; 5'-AMP-activated protein kinase, gamma-1 subunit [Homo sapiens]

Digestion by (Enzyme) : Lys-C  
(MW : 37579.535 Da)

| peptide | observed | theoretical | delta | corresponding sequence | Head | Tail | comment |
|---------|----------|-------------|-------|------------------------|------|------|---------|
| AP-1    | 1036.58  | 1036.58     | 0.00  | [K]GRVVDIYSK[F]        | 235  | 243  |         |
| AP-3    | 1376.75  | 1376.82     | -0.07 | [K]LVVFDTSLQVKK[A]     | 48   | 59   |         |
| AP-4    | 1563.77  | 1563.76     | +0.01 | [K]SHRCYDLIPTSSK[L]    | 35   | 47   |         |
| AP-5    | 1684.81  | 1684.89     | -0.08 | [K]ALQHRSHYFEGVLK[C]   | 265  | 278  |         |

**1** METVISSDSS **11** PAVENEHPQE **21** TPESNNSVYT **31** SFMKSHRCYD **41** LIPTSSKLVV **51** FDTSLQVKKA **61** FFALVTNGVR **71** AAPLWDSKKQ  
**81** SFVGMLTITD **91** FINILHRYRK **101** SALVQIYELE **111** EHKIETWREV **121** YLQDSFKPLV **131** CISPNASLFD **141** AVSSLIRNKI **151** HRLPVIDPES  
**161** GNTLYILTHK **171** RILKFLKLFY **181** TEFPKPEFMS **191** KSLEELQIGT **201** YANIAMVRTT **211** TPVYVALGIF **221** VQHRVSALPV **231** VDEKGRVVDI  
**241** YSKFDVINLA **251** AEKTYNNLDV **261** SVTKALQHRS **271** HYFEGVLKCY **281** LHETLETIIN **291** RLVEAEVHRL **301** VVDENDVVK **311** GIVSLSDILQ  
**321** ALVLTGGEKK P

AMP-activated protein kinase, noncatalytic gamma-1 subunit isoform 1; AMPK gamma-1 chain; 5'-AMP-activated protein kinase, gamma-1 subunit [Homo sapiens]  
ACCESSION [NP\\_002724.1](#)
