# Supplementary material
Source: PubMed Central journal article supplement (PMC1622861)
Supplement: pnas_0603781103_9.pdf [file pnas_0603781103_9.pdf]

The MW of the peptide fragments obtained by MALDI-TOF/MS analysis.

|                  |                  |
|------------------|------------------|
| AP-1 : 701.389   | AP-11 : 2420.327 |
| AP-2 : 916.521   | AP-12 : 2468.492 |
| AP-3 : 1021.511  | AP-13 : 2602.302 |
| AP-4 : 1117.605  |                  |
| AP-5 : 1227.712  |                  |
| AP-6 : 1437.715  |                  |
| AP-7 : 1487.809  |                  |
| AP-8 : 1579.835  |                  |
| AP-9 : 1804.061  |                  |
| AP-10 : 2320.330 |                  |

**Cys modification: carbamidomethylation**

Identificaion to [gi|22907034|ref|NP\\_659434.2| folliculin isoform 1 \[Homo sapiens\]](#)

Digestion by (Enzyme) : **Lys-C**

(MW : **64473.66** Da)

| peptide | observed | theoretical | delta  | corresponding sequence        | Head | Tail | comment |
|---------|----------|-------------|--------|-------------------------------|------|------|---------|
| AP-1    | 701.389  | 701.394     | -0.005 | [K]VDSRPK[E]                  | 524  | 529  |         |
| AP-3    | 1021.511 | 1021.510    | +0.001 | [K]ACGSRLTEK[L]               | 264  | 272  |         |
| AP-5    | 1227.712 | 1227.706    | +0.006 | [K]VRGIIDELQGK[A]             | 193  | 203  |         |
| AP-7    | 1487.809 | 1487.796    | +0.013 | [K]LLSILGASEEDNVK[L]          | 535  | 548  |         |
| AP-11   | 2420.327 | 2420.282    | +0.045 | [K]YEFVVTSGSPVAADRVGPTILNK[I] | 463  | 485  |         |
| AP-13   | 2602.302 | 2602.322    | -0.020 | [K]IEAALTNQNLSVDVVDQCLVCLK[E] | 486  | 508  |         |

|                   |                   |                    |                    |                    |                    |                    |                   |
|-------------------|-------------------|--------------------|--------------------|--------------------|--------------------|--------------------|-------------------|
| <b>1</b>          | <b>11</b>         | <b>21</b>          | <b>31</b>          | <b>41</b>          | <b>51</b>          | <b>61</b>          | <b>71</b>         |
| MNAIVALCHF        | CELHGPRTLFL       | CTEVLHAPLP         | QGDGNEDSPG         | QGEQAEEEEEG        | GIQMNSRMRA         | HSPAEGASVE         | SSSPGPKKSD        |
| <b>81</b>         | <b>91</b>         | <b>101</b>         | <b>111</b>         | <b>121</b>         | <b>131</b>         | <b>141</b>         | <b>151</b>        |
| MCEGCRSLAA        | GHPGYISHDK        | ETSIKYVSHQ         | HPSHPQLFSI         | VRQACVRSL          | CEVCPGREGP         | IFFGDEQHGF         | VFSHTFFIKD        |
| <b>161</b>        | <b>171</b>        | <b>181</b>         | <b>191</b>         | <b>201</b>         | <b>211</b>         | <b>221</b>         | <b>231</b>        |
| SLARGFQRWY        | SIITIMMDRI        | YLINSWPFL          | GK <b>VRGIIDEL</b> | <b>QGK</b> ALKVFEA | EQFGCPQRAQ         | RMNTAFTPFL         | HQRNGNAARS        |
| <b>241</b>        | <b>251</b>        | <b>261</b>         | <b>271</b>         | <b>281</b>         | <b>291</b>         | <b>301</b>         | <b>311</b>        |
| LTSLTSDDNL        | WACLHTSAFW        | LLK <b>ACGSRLT</b> | <b>EKL</b> LEGAPTE | DTLVQMEKLA         | DLEEESESWD         | NSEAESEEKA         | PVLPESTEGR        |
| <b>321</b>        | <b>331</b>        | <b>341</b>         | <b>351</b>         | <b>361</b>         | <b>371</b>         | <b>381</b>         | <b>391</b>        |
| ELTQGAESS         | SLSGCGSWQP        | RKLPVFKSLR         | HMRQVLGAPS         | FRMLAWHVLM         | GNQVIWKS           | VDLVQSAFEV         | LRTMLPVGCV        |
| <b>401</b>        | <b>411</b>        | <b>421</b>         | <b>431</b>         | <b>441</b>         | <b>451</b>         | <b>461</b>         | <b>471</b>        |
| RIIPYSSQYE        | EAYRCNFLGL        | SPHVQIPPHV         | LSSEFAVIVE         | VHAAARSTLH         | PVGCEDDQSL         | SK <b>YEFVVTSG</b> | <b>SPVAADRVGP</b> |
| <b>481</b>        | <b>491</b>        | <b>501</b>         | <b>511</b>         | <b>521</b>         | <b>531</b>         | <b>541</b>         | <b>551</b>        |
| <b>TILNKIEAAL</b> | <b>TNQNLSVDVV</b> | <b>DQCLVCLK</b> EE | WMNKVKVLFK         | FTK <b>VDSRPKE</b> | DTQK <b>LLSILG</b> | <b>ASEEDNVKLL</b>  | KFWMTGLSKT        |
| <b>561</b>        | <b>571</b>        |                    |                    |                    |                    |                    |                   |
| YKSHLMSTVR        | SPTASESRN         |                    |                    |                    |                    |                    |                   |

folliculin isoform 1 [Homo sapiens]

ACCESSION [NP\\_659434.2](#)
