# Supplementary material
Source: PubMed Central journal article supplement (PMC1622861)
Supplement: pnas_0603781103_10.pdf [file pnas_0603781103_10.pdf]

**The MW of the peptide fragments obtained by MALDI-TOF/MS analysis.**

|                 |                 |                 |
|-----------------|-----------------|-----------------|
| AP-1 : 515.28   | AP-11 : 1242.70 | AP-21 : 2541.39 |
| AP-2 : 617.30   | AP-12 : 1296.67 |                 |
| AP-3 : 973.45   | AP-13 : 1308.69 |                 |
| AP-4 : 989.40   | AP-14 : 1559.76 |                 |
| AP-5 : 1039.49  | AP-15 : 1632.88 |                 |
| AP-6 : 1076.54  | AP-16 : 1748.87 |                 |
| AP-7 : 1082.03  | AP-17 : 1759.77 |                 |
| AP-8 : 1151.54  | AP-18 : 1764.85 |                 |
| AP-9 : 1190.70  | AP-19 : 1950.00 |                 |
| AP-10 : 1224.64 | AP-20 : 2278.17 |                 |

**Cys modification: carbamidomethylation**

Identificaion to **gi|72219|pir||HHHU86 heat shock protein 90-alpha - human**  
 Digestion by (Enzyme) : **Lys-C**  
 (MW : **84660.09** Da)

| peptide | observed | theoretical | delta | corresponding sequence      | Head | Tail | comment      |
|---------|----------|-------------|-------|-----------------------------|------|------|--------------|
| AP-1    | 515.28   | 515.37      | -0.09 | [K]VIRK[N]                  | 411  | 414  |              |
| AP-2    | 617.30   | 617.35      | -0.05 | [K]DILEK[K]                 | 577  | 581  |              |
| AP-3    | 973.45   | 973.42      | +0.03 | [K]DYCTRMK[E]               | 479  | 485  | 0Met-ox      |
| AP-4    | 989.40   | 989.41      | -0.01 | [K]DYCTRMK[E]               | 479  | 485  | 1Met-ox      |
| AP-6    | 1076.54  | 1076.54     | 0.00  | [K]KFYEQFSK[N]              | 436  | 443  |              |
| AP-8    | 1151.54  | 1151.56     | -0.02 | [K]YIDQEELNK[T]             | 284  | 292  |              |
| AP-9    | 1190.70  | 1190.69     | +0.01 | [K]ELHINLIPNK[Q]            | 75   | 84   |              |
| AP-10   | 1224.64  | 1224.63     | +0.01 | [K]HIYYITGETK[D]            | 490  | 499  |              |
| AP-11   | 1242.70  | 1242.71     | -0.01 | [K]ADLNNLGTIAK[S]           | 101  | 112  |              |
| AP-12   | 1296.67  | 1296.67     | 0.00  | [K]LGIHEDSQNRK[K]           | 447  | 457  |              |
| AP-13   | 1308.69  | 1308.68     | +0.01 | [K]IRYESLTDPSK[L]           | 59   | 69   |              |
| AP-14   | 1559.76  | 1559.73     | +0.03 | [K]SLTNDWEDHLAVK[H]         | 315  | 327  | 1Trp -> fKyn |
| AP-15   | 1632.88  | 1632.88     | 0.00  | [K]DQVANSASFVERLRK[H]       | 500  | 513  |              |
| AP-16   | 1748.87  | 1748.92     | -0.05 | [K]QDRTLTIIVDTGIGMTK[A]     | 85   | 100  | 0Met-ox      |
| AP-17   | 1759.77  | 1759.81     | -0.04 | [K]AQUALRDNSTMGYMAAK[K]     | 616  | 631  | 2Met-ox      |
| AP-18   | 1764.85  | 1764.91     | -0.06 | [K]QDRTLTIIVDTGIGMTK[A]     | 85   | 100  | 1Met-ox      |
| AP-19   | 1950.00  | 1950.02     | -0.02 | [K]EIFLRELISNSSDALDK[I]     | 42   | 58   |              |
| AP-20   | 2278.17  | 2278.12     | +0.05 | [K]LSELLRYYTSASGDEMVSLEK[D] | 459  | 478  | 1Met-ox      |

|            |            |            |            |            |            |            |            |
|------------|------------|------------|------------|------------|------------|------------|------------|
| <b>1</b>   | <b>11</b>  | <b>21</b>  | <b>31</b>  | <b>41</b>  | <b>51</b>  | <b>61</b>  | <b>71</b>  |
| MPEETQTQDQ | PMEEEEVETF | AFQAEIAQLM | SLIINTFYNS | KEIFLRELIS | NSSDALDKIR | YESLTDPSKL | DSGKELHINL |
| <b>81</b>  | <b>91</b>  | <b>101</b> | <b>111</b> | <b>121</b> | <b>131</b> | <b>141</b> | <b>151</b> |
| IPNKQDRTL  | IVDTGIGMTK | ADLNNLGTI  | AKSGTKAFME | ALQAGADISM | IGQFGVGFYS | AYLVAEKVTV | ITKHNDDEQY |
| <b>161</b> | <b>171</b> | <b>181</b> | <b>191</b> | <b>201</b> | <b>211</b> | <b>221</b> | <b>231</b> |
| AWESSAGGSF | TVRTDTGPEM | GRGTKVILHL | KEDQTEYLEE | RRIKEIVKKH | SQFIGYPITL | FVEKERDKEV | SDDEAEKED  |
| <b>241</b> | <b>251</b> | <b>261</b> | <b>271</b> | <b>281</b> | <b>291</b> | <b>301</b> | <b>311</b> |

|                   |                    |                   |                    |                    |                    |                   |                    |
|-------------------|--------------------|-------------------|--------------------|--------------------|--------------------|-------------------|--------------------|
| KEEKEKEEK         | ESEDKPEIED         | VGSDEEEEEK        | DGDKKKKKKI         | KEK <b>YIDQEEL</b> | <b>NKTKPIWTRN</b>  | PDDITNEEYG        | EFYK <b>SLTNDW</b> |
| <b>321</b>        | <b>331</b>         | <b>341</b>        | <b>351</b>         | <b>361</b>         | <b>371</b>         | <b>381</b>        | <b>391</b>         |
| <b>EDHLAVKHFS</b> | VEGQLEFRAL         | LFVPRRAPFD        | LFENRKKKNN         | IKLYVRRVFI         | MDNCEELIPE         | YLNfirGVVD        | SEDLPLNISR         |
| <b>401</b>        | <b>411</b>         | <b>421</b>        | <b>431</b>         | <b>441</b>         | <b>451</b>         | <b>461</b>        | <b>471</b>         |
| EMLQQSKILK        | <b>VIRKNLVKKC</b>  | LELFTELAED        | KENYK <b>KFYEQ</b> | <b>FSKNIKLGIH</b>  | <b>EDSQNRKKLS</b>  | <b>ELLRYYTSAS</b> | <b>GDEMVS�KDY</b>  |
| <b>481</b>        | <b>491</b>         | <b>501</b>        | <b>511</b>         | <b>521</b>         | <b>531</b>         | <b>541</b>        | <b>551</b>         |
| <b>CTRMKENQKH</b> | <b>IYYITGETKD</b>  | <b>QVANSAFVER</b> | <b>LRKHGLEVIY</b>  | MIEPIDEYCV         | QQLKEFEGKT         | LVSVTKEGLE        | LPEDEEEKKK         |
| <b>561</b>        | <b>571</b>         | <b>581</b>        | <b>591</b>         | <b>601</b>         | <b>611</b>         | <b>621</b>        | <b>631</b>         |
| QEEKKTKFEN        | LCKIM <b>KDILE</b> | <b>KKVEKVVSNS</b> | RLVTSPCCIV         | TSTYGWTANM         | ERIMK <b>AQALR</b> | <b>DNSTMGYMAA</b> | <b>KKHLEINPDH</b>  |
| <b>641</b>        | <b>651</b>         | <b>661</b>        | <b>671</b>         | <b>681</b>         | <b>691</b>         | <b>701</b>        | <b>711</b>         |
| SIETLRQKA         | EADKNDKSVK         | DLVILLYETA        | LLSSGFSLED         | PQTHANRIYR         | MIKLGLGIDE         | DDPTADDTSA        | AVTEEMPPLE         |
| <b>721</b>        | <b>731</b>         |                   |                    |                    |                    |                   |                    |
| GDDDTSRMEE        | VD                 |                   |                    |                    |                    |                   |                    |

---

heat shock protein 90-alpha - human  
 ACCESSION [HHHU86](#)

---
