# Supplementary material
Source: PubMed Central journal article supplement (PMC1622861)

**A**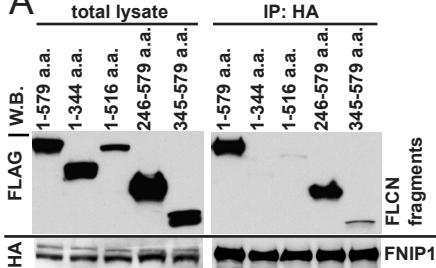**FLCN-FLAG fragments**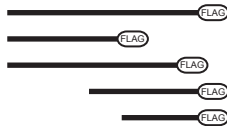

1-579a.a.

+++

1-344a.a.

+/-

1-516a.a.

-

246-579a.a.

++

345-579a.a.

+

**FNIP1 binding**

Supplement: pnas_0603781103_2.pdf [file pnas_0603781103_2.pdf]

**A**

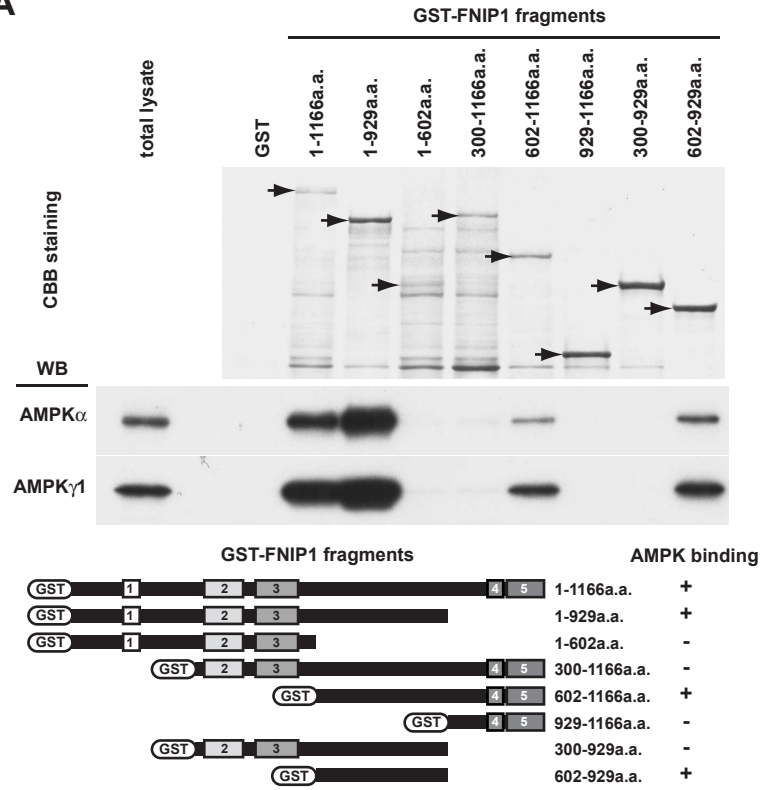

**B**

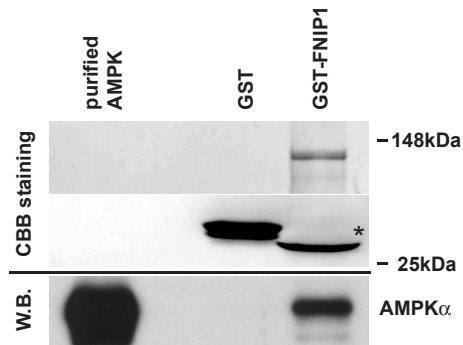

Supplement: pnas_0603781103_3.pdf [file pnas_0603781103_3.pdf]

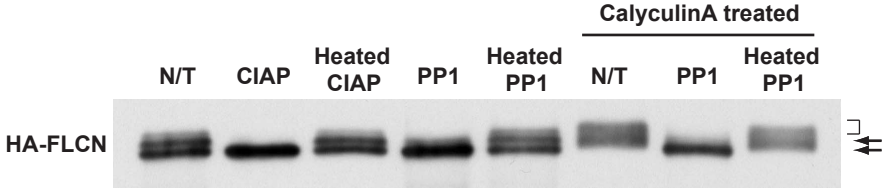

Supplement: pnas_0603781103_4.pdf [file pnas_0603781103_4.pdf]

GST

GST-FLCN

AMP

- - + +

- - + +

SAMS

- + - +

- + - +

Autoradiography



<sup>32</sup>P-GST-FLCN

GST

CBB staining

GST-FLCN

GST

Supplement: pnas_0603781103_5.pdf [file pnas_0603781103_5.pdf]

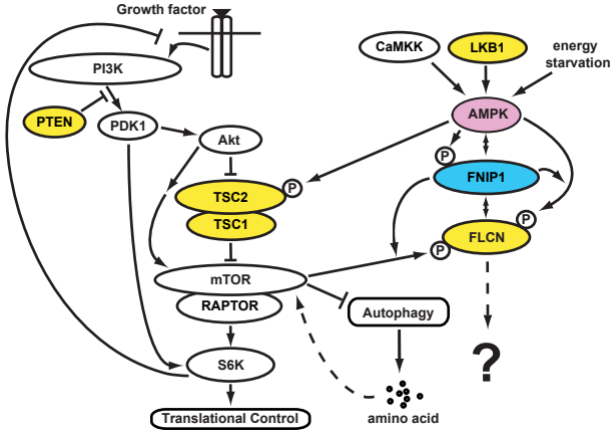

Supplement: pnas_0603781103_6.pdf [file pnas_0603781103_6.pdf]
